# Supplementary material for: COVID-19 Vaccine Acceptance among Low- and Lower-Middle-Income Countries: A Rapid Systematic Review and Meta-Analysis
Source: MDPI journal article supplement (doi:10.3390/vaccines10030427), 2022-03-11
Supplement: s1 [file s1]

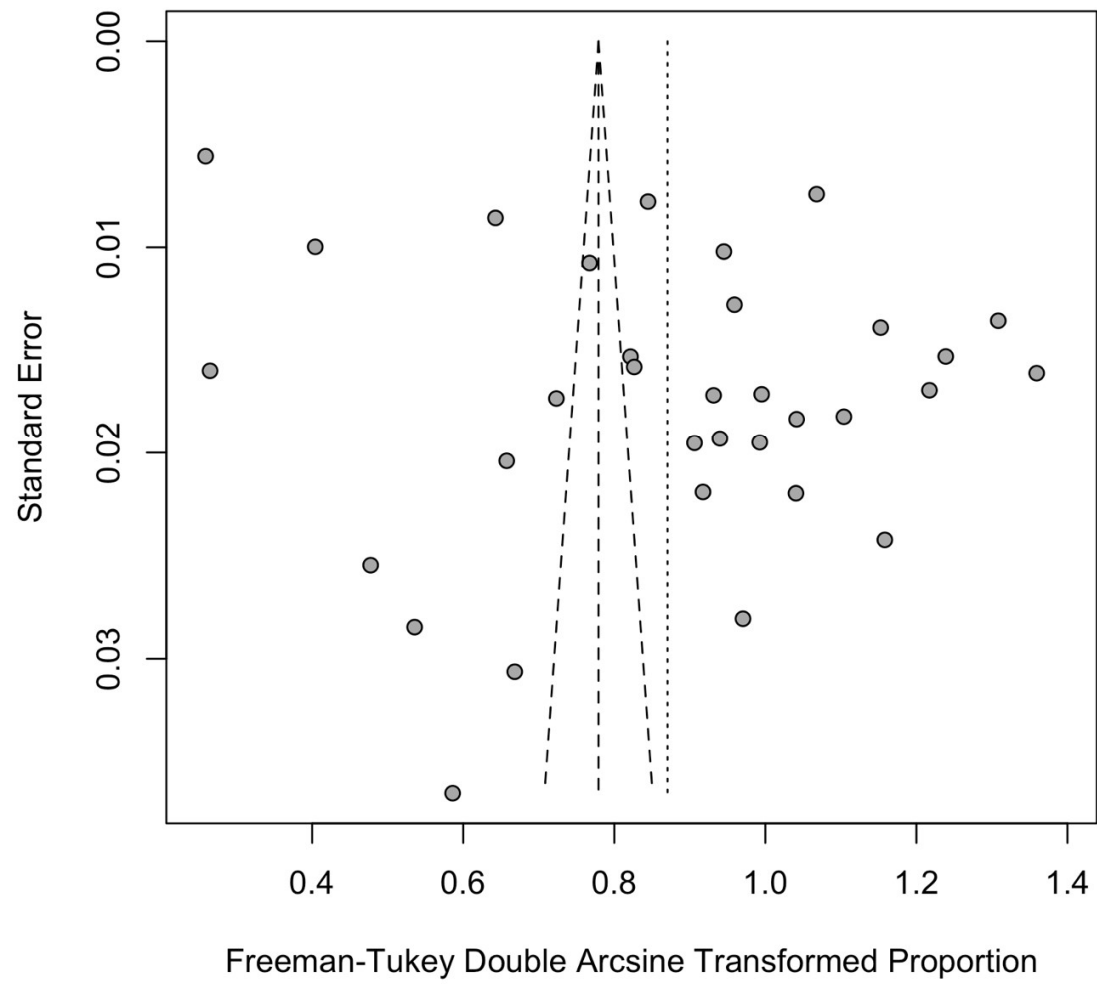

**Figure S1.** Funnel plot of vaccine acceptance.

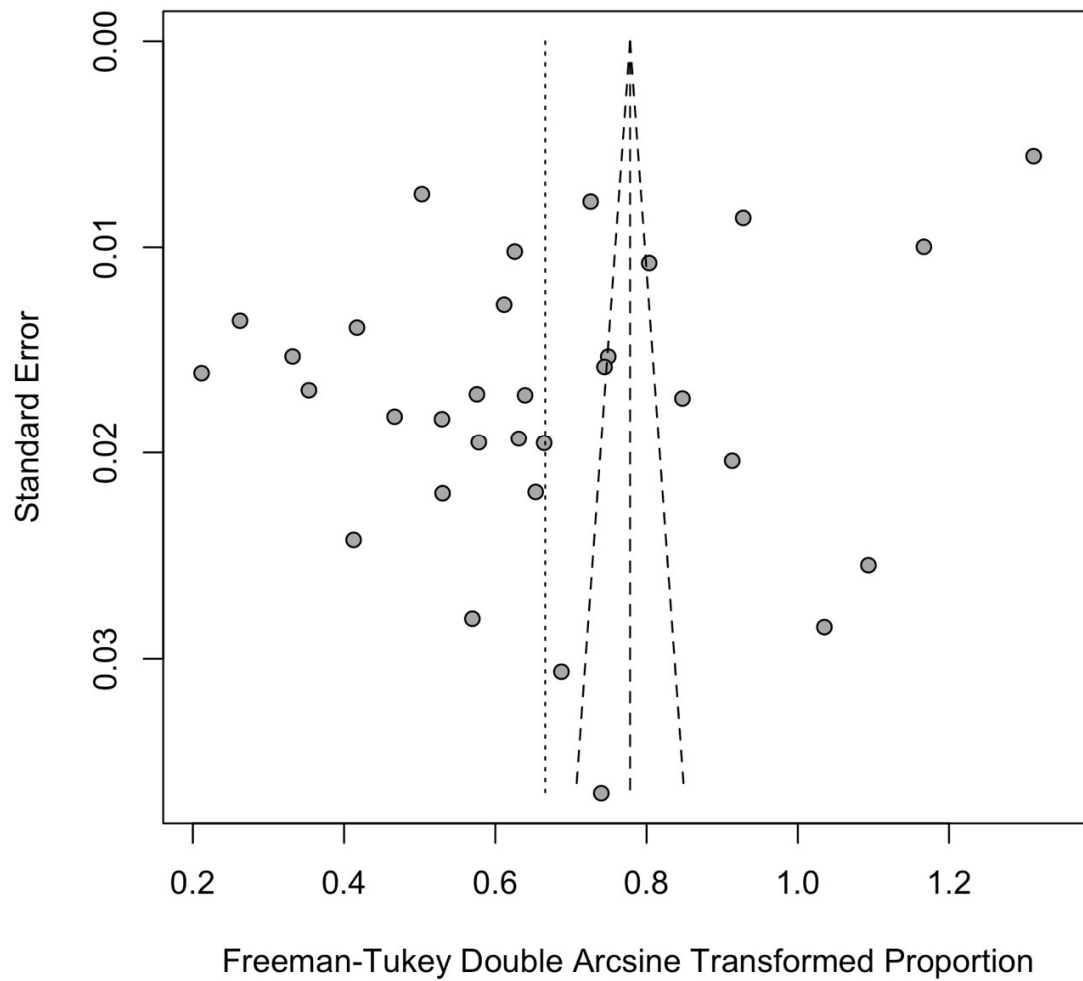

**Figure S2.** Funnel plot of vaccine hesitance.

**Table S1.** Risk of bias for included studies in the systematic review.

| SL | Author Reference         | 1. Were the Criteria for Inclusion in the Sample Clearly Defined? | 2. Were the Study Subjects and the Setting Described in Detail? | 3. Was the Exposure Measured in a Valid and Reliable Way? | 4. Were Objective, Standard Criteria Used for Measurement of the Condition? | 5. Were Confounding Factors Identified? | 6. Were Strategies to Deal with Confounding Factors Stated? | 7. Were the Outcomes Measured in a Valid and Reliable Way? | 8. Was Appropriate Statistical Analysis Used? | Total (%) | Quality Level (High: $\geq 50\%$ ; Low: $< 50\%$ ) |
|----|--------------------------|-------------------------------------------------------------------|-----------------------------------------------------------------|-----------------------------------------------------------|-----------------------------------------------------------------------------|-----------------------------------------|-------------------------------------------------------------|------------------------------------------------------------|-----------------------------------------------|-----------|----------------------------------------------------|
| 1  | Adebisi et al. [29]      | 1                                                                 | 1                                                               | 1                                                         | 1                                                                           | 0                                       | NC                                                          | 0                                                          | 1                                             | 62.5      | High                                               |
| 2  | Ahmed et al. [30]        | 1                                                                 | 1                                                               | 1                                                         | 1                                                                           | 0                                       | NC                                                          | 0                                                          | 1                                             | 62.5      | High                                               |
| 3  | Ahmed et al. [20]        | 1                                                                 | 1                                                               | 1                                                         | 1                                                                           | 0                                       | NC                                                          | 0                                                          | 1                                             | 62.5      | High                                               |
| 4  | Akiful Haque et al. [17] | 1                                                                 | 1                                                               | 1                                                         | 1                                                                           | 0                                       | 0                                                           | 1                                                          | 1                                             | 75        | High                                               |
| 5  | Alam et al. [18]         | 1                                                                 | 1                                                               | 1                                                         | 1                                                                           | 1                                       | 1                                                           | 0                                                          | 1                                             | 87.5      | High                                               |
| 6  | Arshad et al. [19]       | 1                                                                 | 1                                                               | 1                                                         | 0                                                                           | 0                                       | 0                                                           | 0                                                          | 1                                             | 50        | High                                               |
| 7  | Bongomin et al. [31]     | 1                                                                 | 1                                                               | 1                                                         | 0                                                                           | 0                                       | 0                                                           | 0                                                          | 1                                             | 50        | High                                               |
| 8  | Bono et al. [32]         | 1                                                                 | 1                                                               | 1                                                         | 0                                                                           | 0                                       | 0                                                           | 1                                                          | 1                                             | 62.5      | High                                               |
| 9  | Bono et al. [32]         | 1                                                                 | 1                                                               | 1                                                         | 1                                                                           | 0                                       | 0                                                           | 1                                                          | 1                                             | 75        | High                                               |

|    |                             |   |   |   |   |   |   |   |   |      |      |
|----|-----------------------------|---|---|---|---|---|---|---|---|------|------|
| 10 | Carcelen et al. [33]        | 1 | 1 | 1 | 1 | 0 | 0 | 1 | 1 | 75   | High |
| 11 | Carpio et al. [34]          | 1 | 1 | 1 | 1 | 0 | 0 | 1 | 1 | 75   | High |
| 12 | Dinga et al. [21]           | 1 | 1 | 1 | 0 | 0 | 0 | 1 | 1 | 62.5 | High |
| 13 | Echoru et al. [35]          | 1 | 1 | 1 | 1 | 0 | 0 | 1 | 0 | 62.5 | High |
| 14 | Elgendy and Abdelrahim [36] | 1 | 1 | 1 | 1 | 0 | 0 | 1 | 1 | 75   | High |
| 15 | El-Sokkary et al. [37]      | 1 | 1 | 1 | 1 | 1 | 1 | 1 | 1 | 100  | High |
| 16 | Fares et al. [22]           | 1 | 1 | 1 | 1 | 0 | 0 | 0 | 1 | 62.5 | High |
| 17 | Hammam et al. [38]          | 1 | 1 | 1 | 1 | 0 | 0 | 1 | 1 | 75   | High |
| 18 | Harapan et al. [8]          | 1 | 1 | 1 | 1 | 0 | 0 | 1 | 1 | 75   | High |
| 19 | Huynh et al. [39]           | 1 | 1 | 1 | 0 | 0 | 0 | 0 | 1 | 50   | High |
| 20 | Jain et al. [40]            | 1 | 1 | 1 | 0 | 0 | 0 | 0 | 1 | 50   | High |
| 21 | Kanyike et al. [41]         | 1 | 1 | 1 | 1 | 0 | 0 | 1 | 1 | 75   | High |
| 22 | Kaur et al. [42]            | 1 | 1 | 1 | 1 | 0 | 0 | 1 | 1 | 75   | High |
| 23 | Kitonsa et al. [43]         | 1 | 1 | 1 | 1 | 0 | 0 | 0 | 1 | 62.5 | High |

|    |                                             |   |   |   |   |   |   |   |   |      |      |
|----|---------------------------------------------|---|---|---|---|---|---|---|---|------|------|
| 24 | Kumari et al.<br>[44]                       | 1 | 1 | 1 | 1 | 0 | 0 | 1 | 1 | 75   | High |
| 25 | Lampthey et<br>al. [45]                     | 1 | 1 | 1 | 1 | 0 | 0 | 1 | 1 | 75   | High |
| 26 | Lazarus et al.<br>[46]                      | 1 | 1 | 1 | 1 | 0 | 0 | 1 | 1 | 75   | High |
| 27 | Lazarus et al.<br>[47]                      | 1 | 1 | 1 | 1 | 0 | 0 | 0 | 1 | 62.5 | High |
| 28 | Mohamad et<br>al. [48]                      | 1 | 1 | 1 | 1 | 0 | 0 | 0 | 1 | 62.5 | High |
| 29 | Panda et al.<br>[49]                        | 1 | 1 | 1 | 1 | 0 | 0 | 1 | 0 | 62.5 | High |
| 30 | Parvej et al.<br>[50]                       | 1 | 1 | 1 | 0 | 1 | 1 | 1 | 1 | 87.5 | High |
| 31 | Paudel et al.<br>[51]                       | 1 | 1 | 1 | 0 | 0 | 0 | 0 | 1 | 50   | High |
| 32 | Qunaibi et al.<br>[52]                      | 1 | 1 | 0 | 1 | 0 | 0 | 0 | 1 | 50   | High |
| 33 | Ramesh<br>Masthi and<br>Sowmyashree<br>[53] | 1 | 1 | 1 | 0 | 0 | 0 | 0 | 1 | 50   | High |
| 34 | Saied et al.<br>[54]                        | 1 | 1 | 0 | 1 | 0 | 0 | 1 | 1 | 62.5 | High |
| 35 | Skjefte et al.<br>[55]                      | 1 | 1 | 1 | 1 | 0 | 0 | 0 | 1 | 62.5 | High |
| 36 | Solis Arce et<br>al. [15]                   | 1 | 1 | 1 | 1 | 0 | 0 | 0 | 1 | 62.5 | High |

Yes (1); No (0); Not clear (NC).

**Table S2.** Tests for publication bias

| Outcome    | No. of Studies | Egger's <i>p</i> -Value | Interpretation                                                |
|------------|----------------|-------------------------|---------------------------------------------------------------|
| Acceptance | 33             | 0.02                    | Eggers' test indicates the presence of funnel plot asymmetry. |
| Hesitancy  | 32             | 0.007                   | Eggers' test indicates the presence of funnel plot asymmetry. |
